1 CSF metabolites associate with CSF tau and improve prediction of  
2 Alzheimer's disease status

3 Ruo Cheng Dong<sup>1</sup>, Burcu F. Darst<sup>2</sup>, Yuetiva Deming<sup>1</sup>, Yue Ma<sup>6</sup>, Qiongshi Lu<sup>3</sup>,  
4 Henrik Zetterberg<sup>7-10</sup>, Kaj Blennow<sup>7,8</sup>, Cynthia M. Carlsson<sup>4,6</sup>, Sterling C.  
5 Johnson<sup>4,6</sup>, Sanjay Asthana<sup>5,6</sup>, Corinne D. Engelman<sup>1,4,6\*</sup>

6 <sup>1</sup>Department of Population Health Sciences, University of Wisconsin School of  
7 Medicine and Public Health, Madison, WI, 53726, USA

8 <sup>2</sup>Center for Genetic Epidemiology, Keck School of Medicine, University of  
9 Southern California, Los Angeles, CA, 90033, USA

10 <sup>3</sup>Department of Biostatistics and Medical Informatics, University of Wisconsin,  
11 Madison, WI, 53792, USA

12 <sup>4</sup>Wisconsin Alzheimer's Institute, University of Wisconsin School of Medicine  
13 and Public Health, Madison, WI, 53719, USA

14 <sup>5</sup>Geriatric Research Education and Clinical Center, Wm. S. Middleton Memorial  
15 VA Hospital, Madison, WI, 53705, USA

16 <sup>6</sup>Alzheimer's Disease Research Center, University of Wisconsin School of  
17 Medicine and Public Health, Madison, WI, 53792, USA

18 <sup>7</sup>Institute of Neuroscience and Physiology, The Sahlgrenska Academy at  
19 University of Gothenburg, Mölndal, 41390, Sweden

20 <sup>8</sup>Clinical Neurochemistry Laboratory, Sahlgrenska University Hospital,  
21 Mölndal, 41345, Sweden

22 <sup>9</sup>UK Dementia Research Institute at UCL, London, WC1E6BT, UK

23 <sup>10</sup>Department of Neurodegenerative Disease, UCL Institute of Neurology,  
24 London, WC1H0AL, UK

25 \* Correspondence:

26 Corinne D. Engelman

27 610 Walnut Street, 1007A WARF Madison, WI, 53726, USA

28 Phone: 608-265-5491, email: [cengelman@wisc.edu](mailto:cengelman@wisc.edu)

29 **Abstract**

30 INTRODUCTION: Cerebrospinal fluid (CSF) total tau (t-tau) and  
31 phosphorylated tau (p-tau) are biomarkers of Alzheimer's disease  
32 (AD), yet much is unknown about AD-associated changes in tau  
33 metabolism and tau tangle etiology. METHODS: We assessed the  
34 variation of t-tau and p-tau explained by 38 previously identified  
35 CSF metabolites using linear regression models in middle-age  
36 controls from the Wisconsin Alzheimer's Disease Research Center,  
37 and predicted AD/mild cognitive impairment (MCI) vs. an  
38 independent set of older controls using metabolites selected by the  
39 least absolute shrinkage and selection operator (LASSO).  
40 RESULTS: The 38 CSF metabolites explained 70.3% and 75.7%  
41 of the variance in t-tau and p-tau. Of these, 7 LASSO-selected  
42 metabolites improved the prediction ability of AD/MCI vs. older  
43 controls (AUC score increased from 0.92 to 0.97 and 0.78 to 0.93)  
44 compared to the base model. DISCUSSION: These tau-correlated  
45 CSF metabolites increase AD/MCI prediction accuracy and may  
46 provide insight into tau tangle etiology.

47

48 **Keywords: Alzheimer's disease, CSF, metabolite,**  
49 **metabolomics, t-tau, p-tau**

50

51

52 **1. Introduction**

53           One of the defining neuropathological changes in  
54 Alzheimer's disease (AD) is the intraneuronal aggregates of  
55 hyperphosphorylated and misfolded tau that give rise to  
56 neurofibrillary tangles and neuropil threads [1]. Their  
57 corresponding biomarkers in cerebrospinal fluid (CSF), total tau (t-  
58 tau) and phosphorylated tau (p-tau), can predict clinical AD and its  
59 progression [2]. Moreover, a new plasma p-tau biomarker (p-  
60 tau181) has recently been associated with AD pathology [3].  
61 Research has been done to understand tau changes and how they  
62 happen [4,5]. For example, it has been shown that the  
63 dysregulation of kinases and phosphatases results in three to four  
64 times greater quantities of phosphorylated tau in the brains of AD  
65 patients than in normal adult brains [2], but the pathologic  
66 processes remain largely unknown.

67           Recent advancements in metabolomics technologies allow  
68 researchers to study multiple small molecules (<1500 Da), such as  
69 amino acids, fatty acids, and carbohydrates, simultaneously within  
70 a biological system [6]. Metabolites can be influenced by  
71 biological changes resulting from upstream molecular processes  
72 such as genetic mutations, as well as exogenous changes caused by  
73 environmental exposures (*e.g.*, diet, medications, and physical  
74 activity). Moreover, compared to RNA transcripts and proteins,

75 metabolites are more relevant to the current physiological state of a  
76 cell, and their abnormal levels and relative ratios can reflect  
77 disease progression, thus, metabolites serve as appropriate targets  
78 for health outcomes research [7].

79           To date, there have been numerous targeted or untargeted  
80 human blood metabolomic studies that focus on AD clinical status  
81 or CSF biomarkers [8]. For example, Toledo *et al.* [9] have  
82 conducted a network analysis using serum metabolites in  
83 participants from the Alzheimer's Disease Neuroimaging Initiative  
84 and found that accumulation of acylcarnitine species indicates  
85 malfunction and alterations in tau metabolism. However, few  
86 studies have been conducted to assess the association between CSF  
87 metabolites and CSF tau. CSF communicates freely with the  
88 interstitial fluid that bathes the neurons and other cell types of the  
89 brain, spinal cord and the cranial and spinal nerves [10], which  
90 makes it an ideal source to study the pathological changes  
91 occurring in AD brains. By linking two well-established AD CSF  
92 biomarkers, CSF t-tau and p-tau, which reflect tau secretion and  
93 phosphorylation, and predict neurodegeneration and cortical tangle  
94 formation, respectively [11], with CSF metabolites, additional  
95 mechanistic information behind the development of pathological  
96 alterations related to tau may be revealed. The findings from  
97 studying CSF metabolites could ultimately be translated into

98 potential AD prevention through modifiable risk factors (*e.g.*,  
99 dietary interventions), better prognostic indicators, or new drug  
100 targets.

101 Darst *et al.* [12] constructed an inter-omics network  
102 consisting of whole blood gene expression, plasma metabolites,  
103 CSF metabolites, and AD risk factors in 1,111 non-Hispanic white  
104 participants from the Wisconsin Registry for Alzheimer's  
105 Prevention (WRAP). Within this inter-omics network, a cluster of  
106 38 CSF metabolites was identified in the subset of 141 individuals  
107 in which CSF was collected, with each individual metabolite being  
108 significantly correlated (p threshold:  $\leq 6.1 \times 10^{-10}$ ) with CSF t-tau  
109 and p-tau, and these collective metabolites accounting for 60.7%  
110 and 64.0% of the variation of t-tau and p-tau, respectively. In this  
111 study, we aimed to (1) replicate these findings and evaluate the  
112 predictive ability of these CSF metabolites in an independent  
113 sample (the IMPACT cohort) from the Wisconsin Alzheimer's  
114 Disease Research Center (Wisconsin ADRC); (2) examine the  
115 predictive performance of the same metabolites present in plasma  
116 in WRAP; (3) identify the major metabolites driving this cluster in  
117 the IMPACT and WRAP cohorts and, in an independent sample,  
118 evaluate whether they can be used as potential biomarkers to  
119 enhance the prediction of AD or mild cognitive impairment (MCI);  
120 and (5) understand the biological functions of all 38 metabolites

121 using pathway analyses to provide insight into disease-related  
122 processes. Our results confirm the previous associations between  
123 38 CSF metabolites and CSF tau and provide potential biological  
124 mechanisms for the development of tau tangles and possible  
125 candidates for CSF metabolite biomarkers or drug targets.

## 126 **2. Methods**

### 127 **2.1 Participants**

128           The Wisconsin ADRC's clinical core cohort started in 2009  
129 and has well-characterized AD and MCI participants, as well as  
130 healthy older controls (HOC), and the IMPACT cohort of initially  
131 cognitively-unimpaired, asymptomatic middle-aged adults [13–  
132 15]. The replication sample for the main analysis included 158  
133 non-Hispanic white individuals from the IMPACT cohort with  
134 cross-sectional CSF samples.

135           WRAP began recruitment in 2001 as a prospective cohort  
136 study of initially cognitively-unimpaired, asymptomatic, middle-  
137 aged adults enriched for a parental history of clinical AD [16]. The  
138 WRAP cohort included 130 and 123 non-Hispanic white  
139 individuals with longitudinal CSF and plasma samples,  
140 respectively. Both the CSF and plasma cohorts included five  
141 sibling pairs, one sibling trio and three sibling quartets. The WRAP  
142 dataset was utilized to reproduce and refine the results from Darst

143 *et.al.* [12] using similar statistical models as those for the IMPACT  
144 cohort.

145           This study was conducted with the approval of the  
146 University of Wisconsin Institutional Review Board, and all  
147 participants provided signed informed consent before participation.

## 148 **2.2 CSF and plasma sample collection and CSF biomarkers** 149 **quantification**

150           Fasting CSF samples for the Wisconsin ADRC cohorts and  
151 WRAP were collected via lumbar puncture [13] following the  
152 same protocol and by the same group of well-trained individuals  
153 [13]. Samples were sent together in two batches to the lab of Drs.  
154 Blennow and Zetterberg in Sweden, where commercially available  
155 enzyme-linked immunosorbent assay (ELISA) methods were used  
156 to quantify CSF t-tau, p-tau, and amyloid-beta 1-42 ( $A\beta_{42}$ )  
157 (INNOTEST® assays HTAU AG, PHOSPHO-TAU[181P], and  $\beta$ -  
158 amyloid1-42, respectively; Fujirebio, Ghent, Belgium) [13]. The  
159 batch-adjusted predicted values for CSF biomarkers were used for  
160 all analyses [17].

161           In WRAP, fasting blood samples were collected in  
162 ethylenediaminetetraacetic acid (EDTA) tubes; the plasma was  
163 pipetted off within one hour of collection and stored at  $-80^{\circ}\text{C}$  [12].  
164 A total of 141 longitudinal samples from 123 individuals in WRAP  
165 with plasma metabolites were available for the main analysis. In

166 the Wisconsin ADRC, blood samples were collected in heparin  
167 tubes, which could influence metabolite values; as such, plasma  
168 metabolomics data have not been generated in Wisconsin ADRC  
169 blood samples. Further details of how plasma and CSF samples  
170 were processed are explained in an earlier study [12].

### 171 **2.3 CSF metabolomic profiling and quality control**

172 CSF and plasma metabolomic analyses and quantification  
173 were performed in one batch by Metabolon (Durham, NC) using  
174 an untargeted approach, based on Ultrahigh Performance Liquid  
175 Chromatography-Tandem Mass Spectrometry platform (UPLC-  
176 MS/MS) [18]. Details of the metabolomic profiling were described  
177 in an earlier study [12].

178 Each metabolite value was first scaled so the median was  
179 equal to one across all samples. Missing values were then imputed  
180 to half the lowest level of detection for each biological metabolite  
181 and 0.0001 (the lowest value that could be accepted in the analytic  
182 software) for each xenobiotic metabolite. The missing percentage  
183 for each of the 38 previously identified CSF metabolites prior to  
184 imputation is shown in Supplemental Table 1. Metabolites with  
185 zero variability between individuals, or with an interquartile range  
186 of zero, were excluded (none of the 38 CSF metabolites were  
187 excluded). Log<sub>10</sub> transformation was employed to normalize the  
188 data. After quality control, the previously identified 38 metabolites



189 were selected for this investigation. The distribution of each of the  
190 38 CSF metabolites after imputation and Log 10 transformation is  
191 shown in Supplemental Figure 1.

## 192 **2.4 Statistical analysis**

### 193 **2.4.1 Prediction performance of the 38 CSF metabolites**

194 To replicate the previously reported results in WRAP [12],  
195 each metabolite's association with t-tau and p-tau was tested in the  
196 IMPACT cohort and the Bonferroni adjustment was applied to  
197 correct for multiple testing. A meta-analysis was also conducted by  
198 using results from IMPACT and WRAP. To replicate the  
199 performance of the cluster of 38 CSF metabolites in explaining  
200 variation in tau pathology, we used linear regression models to  
201 determine the prediction performance ( $r^2$ ) of CSF t-tau and p-tau in  
202 IMPACT. The base models, which included age, sex, and years of  
203 education, were compared to models that also included the 38 CSF  
204 metabolites. To reproduce the results in WRAP and compare them  
205 to IMPACT using consistent statistical models, we determined the  
206 prediction performance ( $r^2$ ) of the 38 CSF metabolites using linear  
207 mixed-effects regression with random intercepts to account for  
208 repeated measures and sibling relationships. In both IMPACT and  
209 WRAP, we randomly split the data into a training (70%) and  
210 validation (30%) set and created plots to compare the observed and  
211 predicted values. Finally, we physically combined the WRAP

212 baseline samples and IMPACT samples and re-conducted the  
213 analysis to evaluate the explained variance. Sex-stratified  
214 prediction differences were assessed in WRAP by fitting the  
215 mentioned models in males and females separately. The number of  
216 male samples in IMPACT was too small to perform sex-stratified  
217 analyses while meeting the degrees of freedom needed by the  
218 model. Of the original 38 CSF metabolites, 34 were also found in  
219 plasma samples from WRAP and were tested together as predictors  
220 for t-tau and p-tau using linear mixed-effects regression models, as  
221 described above. A sensitivity analysis using only the baseline  
222 samples was also conducted in WRAP for both CSF and plasma  
223 metabolites. The statistical analyses here and below were all  
224 conducted in R version 3.6.2. The lme4 package was used.

#### 225 **2.4.2 LASSO selection of important metabolites and their** 226 **prediction of AD/MCI vs. HOC**

227 In order to incorporate a practical number of metabolites in  
228 the prediction model of AD/MCI diagnosis vs. HOC instead of  
229 including all 38 metabolites, the least absolute shrinkage and  
230 selection operator (LASSO) [19] was applied to select the most  
231 important metabolites (those with non-zero estimated effects) for  
232 CSF t-tau and p-tau in both IMPACT and WRAP. In WRAP, the  
233 average of longitudinal CSF measures was used in LASSO  
234 regression. The tau variances explained by the selected metabolites

235 were re-evaluated using similar model from 2.4.1 in both IMPACT  
236 and WRAP. The ability to enhance the prediction of AD/MCI vs.  
237 HOC status by the metabolites selected from LASSO was  
238 evaluated in an independent set of participants from the Wisconsin  
239 ADRC using logistic regression and an area under the curve  
240 (AUC) score. To determine prediction ability of the selected  
241 metabolites beyond demographic factors and established  
242 biomarkers, base models including age, sex, years of education,  
243 *APOE*  $\epsilon$ 4 count, t-tau, p-tau, and  $A\beta_{42}$  were compared to the base  
244 model replacing t-tau and p-tau with the selected metabolites and  
245 also the base model plus the selected metabolites from LASSO.  
246 The analysis here used the “glmnet” package in R.

### 247 **2.4.3 Biological relevance of the 38 CSF metabolites**

248 An exploratory factor analysis was conducted to determine  
249 if subsets of metabolites clustered together in latent factors  
250 associated with t-tau and p-tau. The factor analysis was performed  
251 in IMPACT and WRAP using the “psych” package in R.  
252 Metabolites with a loading of  $\geq 0.4$  [20] in one particular factor and  
253 lower loadings for the rest of the factors were considered as  
254 members of that particular factor. Potential functional pathways of  
255 the 38 metabolites were identified from the Homo sapiens KEGG  
256 pathway by conducting pathway analyses using the web-based  
257 software, Metabo-analyst [21], inputting the metabolites’ human

258 metabolome database (HMDB) IDs, and using the default  
259 hypergeometric test and the relative-betweenness centrality, which  
260 is a measure of centrality in a graph based on the shortest paths  
261 that pass through the vertex. Pathways were considered as  
262 important if the FDR was  $\leq 0.05$  or the impact was  $\geq 0.1$ .

### 263 **3. Results**

#### 264 **3.1 Participant characteristics**

265 Characteristics of the participants can be found in Table 1.  
266 Among 158 Wisconsin ADRC IMPACT participants and 130  
267 WRAP participants who had CSF metabolite data available,  
268 females comprised 74.7% of IMPACT participants and 65.4% of  
269 participants in WRAP. The mean baseline age was significantly  
270 younger in IMPACT (57.8 years) compared to WRAP (61.5 years).  
271 The mean years of education was similar (16.0 and 16.1 years in  
272 IMPACT and WRAP, respectively). Mean CSF t-tau was  
273 significantly lower in IMPACT (283.1) compared to WRAP  
274 (311.5). The correlation between t-tau and p-tau was  
275 approximately 0.90 in IMPACT and WRAP. The characteristics of  
276 each additional sub cohort of the Wisconsin ADRC and of the 123  
277 WRAP participants in the plasma prediction analysis can also be  
278 found in Table 1.

#### 279 **3.2 Prediction performance**

280           Each of the 38 CSF metabolites was significantly  
281 associated with t-tau and p-tau in IMPACT and the direction of the  
282 effect was the same as in WRAP (Supplemental Table 2). Meta-  
283 analysis results are shown in Supplemental Table 3. All  
284 metabolites were significantly associated with t-tau and p-tau  
285 except erythritol. Base models only explained approximately 10%  
286 of the variance in t-tau and p-tau in both IMPACT and WRAP  
287 (Table 2). In IMPACT, the statistical model including the 38 CSF  
288 metabolites and demographics together explained 70.3% of the  
289 variance in t-tau and 75.7% of the variance in p-tau values. These  
290 results were similar to those calculated in WRAP, where the model  
291 including the 38 CSF metabolites and demographics explained  
292 62.4% and 65.1% of the variance in t-tau and p-tau values,  
293 respectively. Similarly, in the combined dataset, the 38 CSF  
294 metabolites explained 66.1% and 72.3% of the variance in t-tau  
295 and p-tau, respectively. The results of the same analysis but only  
296 using baseline samples in WRAP are shown in Supplemental Table  
297 4. Supplemental Figure 2 shows plots comparing the observed and  
298 predicted values for t-tau and p-tau in both IMPACT and WRAP.  
299 In WRAP, these metabolites explained more of the variance in the  
300 t-tau and p-tau in males ( $r^2=0.749$  and  $0.804$ ) than in females  
301 ( $r^2=0.591$  and  $0.640$ ; Table 2). We did not have enough male  
302 participants to fit the sex-stratified model in IMPACT; however,

303 while the female only  $r^2$  was lower than the overall  $r^2$  in WRAP,  
304 this trend was not seen in IMPACT. In WRAP, the 34 of 38  
305 metabolites present in plasma explained 26.9% and 30.1% of the  
306 variance in CSF t-tau and p-tau, respectively (Table 2), which is  
307 relatively low compared to CSF metabolites. We also examined the  
308 same 34 CSF metabolites' prediction ability and confirmed that the  
309 lower  $r^2$  values for the 34 plasma metabolites were not due to the  
310 absence of the four metabolites (Supplemental Table 4).

### 311 **3.3 LASSO results**

312 LASSO results for t-tau and p-tau in both IMPACT and  
313 WRAP are shown in Table 3. Eight metabolites with non-zero  
314 coefficients (ranging from 33.25 to 202.10) were chosen in  
315 IMPACT, and twelve metabolites (coefficients ranging from -  
316 112.48 to 333.57) were selected for t-tau in WRAP. Among the  
317 selected metabolites, five were consistent across IMPACT and  
318 WRAP (N-acetylneuraminate, C-glycosyl tryptophan, X-10457, X-  
319 24228, and 1-palmitoyl-GPC(16:0)). Eleven metabolites in  
320 IMPACT and twelve metabolites in WRAP with non-zero  
321 coefficients (ranging from 1.07 to 28.80 in IMPACT and -4.06 to  
322 30.80 in WRAP) were selected for p-tau, with seven metabolites  
323 overlapping (N-acetylneuraminate, C-glycosyl tryptophan, X-  
324 10457, X-24228, 1-oleoyl-GPC(18:1), 1-palmitoyl-GPC(16:0), and  
325 1-myristoyl-2-palmitoyl-GPC(14:0/16:0)), which included the five

326 metabolites overlapping in the two t-tau models. These seven  
327 metabolites along with demographics explained about 59% and  
328 69% of the variance in t-tau and p-tau, respectively in IMPACT  
329 and 59% and 62%, respectively in WRAP (Table 2).

330           When predicting AD vs. HOC and MCI vs. HOC, the base  
331 models, including age, sex, years of education, *APOE*  $\epsilon$ 4 count, t-  
332 tau, p-tau, and  $A\beta_{42}$ , achieved AUC scores of 0.92 and 0.78,  
333 respectively. Replacing t-tau and p-tau with the seven metabolites  
334 selected by LASSO, that overlapped across IMPACT and WRAP  
335 for t-tau and/or p-tau, achieved AUC scores of 0.94 and 0.82. The  
336 base model plus the seven metabolites collectively improved the  
337 prediction ability of AD vs. HOC (AUC score increased from 0.92  
338 to 0.97) and of MCI vs. HOC (AUC score increased from 0.78 to  
339 0.93; Figure 1). The comparisons of results from the base model  
340 plus seven LASSO selected metabolites to the base model with  
341 seven randomly selected metabolites from 38 metabolites and  
342 seven randomly selected metabolites from all CSF metabolites  
343 with tau outcomes are shown in Supplemental Figure 3.

### 344 **3.4 Biological relevance of the 38 metabolites**

345           The biochemical names, sub-pathways, and super pathways  
346 of the 38 metabolites can be found in Supplemental Table 5, which  
347 also shows the loadings of each metabolite for three latent factors  
348 produced through exploratory factor analysis. These factors

349 included the exact same metabolites and similar loadings for each  
350 in both IMPACT and WRAP and explained about 60% of the  
351 variance in the 38 metabolites. Factor 1 included 25 metabolites in  
352 the following pathways: amino acids, nucleotides, carbohydrates,  
353 cofactors and vitamins, energy, xenobiotics, and unknowns (no  
354 confirmed biochemical names). Factor 2 was composed of eleven  
355 lipids. Two lysophospholipids contributed to factor 3 and they  
356 were selected by LASSO for p-tau in both IMPACT and WRAP.

357       Among the 29 known metabolites, 26 had HMDB IDs and  
358 23 of these were present in the MetaboAnalyst database. In  
359 pathway analyses, these 23 metabolites were enriched in two  
360 KEGG pathways (Figure 2 and Table 4): (1) pentose and  
361 glucuronate interconversions and (2) glycerophospholipid (GP)  
362 metabolism. Three metabolites from Factor 1,  
363 arabinose, arabitol/xylitol, and gulonate, were enriched in pentose  
364 and glucuronate interconversions. Two metabolites, 1-palmitoyl-2-  
365 palmitoleoyl-GPC(16:0/16:1) and 1-oleoyl-GPC(18:1) from  
366 Factors 2 and 3, respectively, were enriched in  
367 glycerophospholipid metabolism.

#### 368 **4. Discussion**

369       Using a cross-sectional sample from the Wisconsin ADRC  
370 IMPACT cohort, we replicated previous findings of 38 CSF  
371 metabolites associated with t-tau and p-tau in WRAP [12]. Not



372 only was each of the 38 CSF metabolites significantly associated  
373 with both tau outcomes after Bonferroni correction, but the high  
374 amount of variance in tau explained by this cluster of 38 CSF  
375 metabolites was confirmed in IMPACT.

376         Among these metabolites, there are 13 lipids, 7 amino  
377 acids, 5 carbohydrates, 1 nucleotide, 1 energy metabolite, 1  
378 cofactor and vitamin metabolite, 1 xenobiotic, and 9 unknown  
379 metabolites. Some of these metabolites, such as 1,2-dipalmitoyl-  
380 GPC(16:0/16:0) and stearyl sphingomyelin(d18:1/18:0), were  
381 previously reported to be associated with AD diagnosis or AD  
382 pathogenesis [22,23]. Orešič et al. (2011) found that serum 1,2-  
383 dipalmitoyl-GPC(16:0/16:0), also called PC(16:0/16:0), was one of  
384 3 metabolites considered to be predictive markers of AD  
385 progression in individuals with MCI [22]. CSF stearyl  
386 sphingomyelin(d18:1/18:0) , also called SM(d18:1/18:0),  
387 distinguished clinical AD from controls, with an accuracy of 70%  
388 and was significantly increased in patients displaying pathological  
389 levels of A $\beta$ <sub>42</sub>, t-tau and p-tau [23], supporting that this molecule  
390 changes in patients with A/T/N pathology. Additionally, the N-  
391 acetylamino acids, N-acetylvaline, N-acetylthreonine, N-  
392 acetylserine, and N-acetyl-isoputresnine, were identified in our  
393 study. N-acetylthreonine and N-acetylserine are the downstream  
394 metabolites of the cleavage process initiated by lysosomal protease

395 tripeptidyl peptidase 1 (TPP1) [24], and previous studies [25,26]  
396 suggested that increased levels of TPP1 enhance fibrillar  $\beta$ -  
397 amyloid degradation. In support of this, a secondary analysis in our  
398 study found that N-acetylserine was significantly associated with  
399  $A\beta_{42}$  (beta=480.38, p=0.002), providing evidence that this CSF  
400 metabolite may be involved in brain amyloid pathology.

401           From the 38 metabolites, 7 were selected by LASSO in  
402 both IMPACT and WRAP: N-acetylneuramate, C-glycosyl  
403 tryptophan, 1-palmitoyl-GPC(16:0), 1-oleoyl-GPC(18:1), 1-  
404 myristoyl-2-palmitoyl-GPC(14:0/16:0), and two unknown  
405 metabolites (X-10457 and X-24228). These improved the  
406 prediction of AD vs. HOC by approximately 5% and MCI vs  
407 HOC by 15% compared to a model that included the well-  
408 established AD risk factors of age, sex, years of education, *APOE*  
409  $\epsilon 4$  count, t-tau, p-tau, and  $A\beta_{42}$ . A recent study in a Japanese  
410 cohort found that CSF N-acetylneuramate was significantly  
411 higher in AD patients, when compared to the idiopathic normal  
412 pressure hydrocephalus, and had a positive correlation with CSF p-  
413 tau (r=0.55) [27]. In our study, CSF N-acetylneuramate was  
414 positively associated with both t-tau and p-tau. C-glycosyl  
415 tryptophan, a sugar-loaded amino acid, has been reported to be  
416 strongly associated with aging, defined by chronological age  
417 (beta=2.47, p= $1.3 \times 10^{-23}$ ), in a human blood metabolome-wide

418 association study [28]. In our study, CSF C-glycosyl tryptophan  
419 was positively associated with t-tau and p-tau. Two lipids 1-  
420 palmitoyl-GPC(16:0) (also called LysoPC(16:0/0:0)) and 1-  
421 myristoyl-2-palmitoyl-GPC(14:0/16:0) (also called PC(14:0/16:0)),  
422 belong to the class of lysophospholipid (LysoPCs) and  
423 phosphatidylcholines (PCs), respectively. Previous studies have  
424 shown that numerous plasma/serum metabolites from the LysoPC  
425 and PC classes were significantly associated with MCI and AD  
426 dementia or able to discriminate MCI and AD dementia cases from  
427 controls [9,29–34]. In a randomized crossover trial that treated  
428 mild to moderate AD patients with medium-chain triglycerides, 1-  
429 palmitoyl-GPC(16:0) levels increased along with an improvement  
430 in cognition [34]. These seven LASSO-selected metabolites  
431 improved the prediction of AD and MCI status, suggesting they  
432 may be useful biomarkers for clinical AD and MCI diagnosis.

433 Another interesting discovery from the LASSO results is  
434 that, while five metabolites were overlapping in IMPACT and  
435 WRAP for both t-tau and p-tau, two metabolites, 1-oleoyl-  
436 GPC(18:1) (also called LysoPC(18:1(9Z)/0:0)) and 1-myristoyl-2-  
437 palmitoyl-GPC(14:0/16:0) (also called PC(14:0/16:0)) were  
438 selected only for p-tau, not t-tau. Since p-tau is more specific to  
439 AD-related tau pathology than t-tau, these metabolites might

440 provide insight into the pathological processes involved in tau  
441 tangle formation in AD.

442           When using the seven metabolites to predict AD/MCI vs.  
443 HOC, the AUC scores from both the base model and base  
444 model+metabolites were higher for AD than for MCI. However, a  
445 greater improvement in prediction accuracy for MCI vs. HOC  
446 (15%) was achieved than AD vs. HOC (5%). One possible reason  
447 could be that the 38 CSF metabolites were originally identified  
448 from the WRAP cohort, whose participants were relatively young  
449 and have not been diagnosed with AD yet. Another explanation  
450 could be that the base model, which included demographics,  
451 APOE  $\epsilon$ 4 count, and three core AD CSF biomarkers, already  
452 achieved a very high accuracy for predicting AD vs. HOC and had  
453 little room for improvement.

454           In WRAP, we were able to test the prediction of 34 of the  
455 38 metabolites that were found in plasma. We found that these 34  
456 metabolites collectively did not explain much variation in CSF  
457 concentrations of t-tau and p-tau ( $r^2$  between 0.286 and 0.303).  
458 This was not due to the absence of the 4 metabolites, since the  $r^2$  of  
459 the 34 metabolites in the CSF (0.621 to 0.641) was close to that  
460 with all 38 metabolites (0.624 to 0.651) in WRAP. Moreover, the  
461 correlations between the same 34 metabolites measured in both  
462 CSF and plasma are relatively low (-0.13 to 0.30) [12]

463 (Supplemental Figure 4). We previously proposed that this low  
464 correlation could be attributed to these metabolites not being able  
465 to cross the blood brain barrier (BBB) [35]. For example,  
466 cholesterol metabolism in the brain relies on its own cells to  
467 produce cholesterol, and the transport of cholesterol from  
468 peripheral circulation into the brain is prevented by the BBB  
469 [36,37]. In this situation, the concentrations and functions of  
470 metabolites like cholesterol are different across the BBB. Thus,  
471 testing for these metabolites in a more readily available body fluid,  
472 like blood, does not appear to be a viable option.

473           The factor analysis results suggest that the 38 metabolites  
474 are associated with tau through three main clusters (1) the  
475 combination of select amino acids, nucleotides, carbohydrates,  
476 cofactors and vitamins, energy, xenobiotics, and unknown  
477 metabolites; (2) phosphatidylcholines and sphingolipid  
478 metabolism, and (3) lysophospholipids. Five metabolites from  
479 these factors were enriched in (1) pentose and glucuronate  
480 interconversions and (2) glycerophospholipid metabolism from the  
481 pathway analysis. The pentose and glucuronate interconversion  
482 pathway was suggested from genomics and metabolomics studies  
483 to be involved in AD [38–40]. A urinary metabolomics study of  
484 APP/PS1 transgenic mice of AD and a hippocampal metabolomics  
485 study of CRND8 mice also identified this pathway [41,42]. Other

486 studies have shown that brain glucose dysregulation and pentose  
487 related activities are associated with AD pathology [43–46]. Thus,  
488 our results provide further potential links between molecules in  
489 pentose and glucuronate metabolism, especially the three CSF  
490 metabolites, arabinose, xylitol, and gulonate, and the tau  
491 pathological process of AD.

492         The brain is the most cholesterol-rich organ, containing  
493 glycerophospholipids, cholesterol, sphingolipids, etc. [47]. The  
494 neural membranes are also composed of these lipids and the  
495 evidence suggests that glycerophospholipids and  
496 glycerophospholipid metabolism may associate with neural  
497 membrane composition alterations, glycerolipid-derived lipid-  
498 mediated oxidative stress, and neuroinflammation [9,48]. For  
499 example, levels of glycerophospholipids were decreased in brain  
500 autopsy samples from AD patients compared to age-matched  
501 controls [49]. In another study, increased glycerophospholipid  
502 levels were associated with increased activities of lipolytic  
503 enzymes and elevated concentrations of phospholipid degradation  
504 metabolites [50]. In our analysis, the two metabolites, 1-palmitoyl-  
505 2-palmitoleoyl-GPC(16:0/16:1) and 1-oleoyl-GPC(18:1), from  
506 Factors 2 and 3 were in a feedback loop and their levels were  
507 influenced by the genes *LCAT*, *PLA2G4B*, and *LPCAT*  
508 (Supplemental Figure 5.) Previous studies have suggested that

509 *LCAT* and *LPCAT* are related to AD [51,52]. Thus, by connecting  
510 glycerophospholipids, especially these two metabolites with t-tau  
511 and p-tau, we provide further evidence for their connections with  
512 AD pathogenesis.

513         Our sample sizes were relatively small for both IMPACT  
514 and WRAP; however, the 38 CSF metabolites' associations with  
515 CSF t-tau and p-tau levels identified before [12] were replicated in  
516 the independent IMPACT data, strengthening our confidence that  
517 these 38 metabolites are important for tau pathology. However,  
518 further research is necessary to understand whether a causal  
519 relationship exists between these CSF metabolites and tau  
520 pathology. One limitation of this study is that both IMPACT and  
521 WRAP are predominantly non-Hispanic white/Caucasian, so the  
522 findings of this study may not be generalizable to other  
523 races/ethnicities. Another limitation is that most of the 38  
524 metabolites are highly correlated with each other. LASSO selected  
525 seven metabolites that have non-zero effects on tau, but the  
526 resulting metabolites are still correlated with each other  
527 (Supplemental Figure 6; range of 0.40 to 0.96). A more  
528 sophisticated approach that can further remove non-independent  
529 metabolites is needed for clinical application. A third limitation is  
530 that in our pathway analysis, only three or two metabolites were  
531 included in the enriched pathways (pentose and glucuronate

532 interconversions and glycerophospholipid metabolism,  
533 respectively). Future research will be necessary to confirm these  
534 results.

535           In summary, we aimed to replicate earlier findings of 38  
536 CSF metabolites' correlation with tau and expand the biological  
537 knowledge of them to better understand their roles in AD  
538 pathogenesis. 38 CSF metabolites individually associated with two  
539 tau outcomes significantly and, together, explained a large amount  
540 of variance in tau. A subset of these metabolites, selected by  
541 LASSO, improved the prediction accuracy of AD/MCI vs. HOC  
542 over a model that included established predictors of AD. Two  
543 promising metabolic pathways, pentose and glucuronate  
544 interconversions metabolism and glycerophospholipid metabolism,  
545 were identified in this study and have been shown to be related to  
546 AD in previous literature. IMPACT and WRAP are ongoing  
547 longitudinal studies that are continuing to collect plasma and CSF  
548 from study participants, and additional data will be generated in  
549 the future. These data may help fill in gaps regarding the  
550 mechanisms linking metabolites and AD, improve the  
551 establishment of CSF-based metabolite biomarkers, and identify  
552 novel drug targets.

553

554 **Acknowledgements**



555 The authors especially thank the WRAP and Wisconsin ADRC  
556 participants and staff for their contributions to the studies. Without  
557 their efforts this research would not be possible. This study was  
558 supported by the National Institutes of Health (NIH) grants  
559 [R01AG27161 (Wisconsin Registry for Alzheimer Prevention:  
560 Biomarkers of Preclinical AD), R01AG054047 (Genomic and  
561 Metabolomic Data Integration in a Longitudinal Cohort at Risk for  
562 Alzheimer's Disease), and P30AG062715 (Wisconsin Alzheimer's  
563 Disease Research Center Grant)], the Helen Bader Foundation,  
564 Northwestern Mutual Foundation, Extencicare Foundation, State  
565 of Wisconsin, the Clinical and Translational Science Award  
566 (CTSA) program through the NIH National Center for Advancing  
567 Translational Sciences (NCATS) grant [UL1TR000427], and the  
568 University of Wisconsin-Madison Office of the Vice Chancellor  
569 for Research and Graduate Education with funding from the  
570 Wisconsin Alumni Research Foundation. This research was  
571 supported in part by the Intramural Research Program of the  
572 National Institute on Aging. Computational resources were  
573 supported by core grants to the Center for Demography and  
574 Ecology [P2CHD047873] and the Center for Demography of  
575 Health and Aging [P30AG017266]. Author Y Deming was  
576 supported by a training grant from the National Institute on Aging  
577 [T32AG000213]. HZ is a Wallenberg Scholar supported by grants

578 from the Swedish Research Council [#2018-02532], the European  
579 Research Council [#681712], the Swedish state under the  
580 agreement between the Swedish government and the County  
581 Councils, the ALF-agreement [#ALFGBG-720931], the Alzheimer  
582 Drug Discovery Foundation (ADDF), USA [#201809-2016862],  
583 and the UK Dementia Research Institute at UCL.

584 KB is supported by the Swedish Research Council (#2017-  
585 00915), ADDF, USA [#RDAPB-201809-2016615], the Swedish  
586 Alzheimer Foundation [#AF-742881], Hjärnfonden, Sweden  
587 [#FO2017-0243], the Swedish state under the agreement between  
588 the Swedish government and the County Councils, the ALF-  
589 agreement [#ALFGBG-715986], and European Union Joint  
590 Program for Neurodegenerative Disorders [JPND2019-466-236].

#### 591 **Conflicts of interest**

592 HZ has served at scientific advisory boards for Denali, Roche  
593 Diagnostics, Wave, Samumed and CogRx, has given lectures in  
594 symposia sponsored by Fujirebio, Alzecure and Biogen, and is a  
595 co-founder of Brain Biomarker Solutions in Gothenburg AB  
596 (BBS), which is a part of the GU Ventures Incubator Program. KB  
597 has served as a consultant or at advisory boards for Abcam, Axon,  
598 Biogen, Lilly, MagQu, Novartis and Roche Diagnostics, and is a  
599 co-founder of Brain Biomarker Solutions in Gothenburg AB  
600 (BBS), which is a part of the GU Ventures Incubator Program.

601

602 **Reference**

- 603 [1] Serrano-Pozo A, Frosch MP, Masliah E, Hyman BT.  
604 Neuropathological Alterations in Alzheimer Disease. *Cold*  
605 *Spring Harb Perspect Med* 2011;1.  
606 <https://doi.org/10.1101/cshperspect.a006189>.
- 607 [2] Zetterberg H a. Cerebrospinal fluid biomarkers for  
608 Alzheimer’s disease: current limitations and recent  
609 developments. *Current Opinion in Psychiatry* 2015;28:402–9.  
610 <https://doi.org/10.1097/YCO.0000000000000179>.
- 611 [3] Karikari TK, Pascoal TA, Ashton NJ, Janelidze S, Benedet  
612 AL, Rodriguez JL, et al. Blood phosphorylated tau 181 as a  
613 biomarker for Alzheimer’s disease: a diagnostic performance  
614 and prediction modelling study using data from four  
615 prospective cohorts. *The Lancet Neurology* 2020;19:422–33.  
616 [https://doi.org/10.1016/S1474-4422\(20\)30071-5](https://doi.org/10.1016/S1474-4422(20)30071-5).
- 617 [4] Barghorn S, Mandelkow E. Toward a Unified Scheme for the  
618 Aggregation of Tau into Alzheimer Paired Helical Filaments.  
619 *Biochemistry* 2002;41:14885–96.  
620 <https://doi.org/10.1021/bi026469j>.
- 621 [5] Jouanne M, Rault S, Voisin-Chiret A-S. Tau protein  
622 aggregation in Alzheimer’s disease: An attractive target for  
623 the development of novel therapeutic agents. *European*  
624 *Journal of Medicinal Chemistry* 2017;139:153–67.  
625 <https://doi.org/10.1016/j.ejmech.2017.07.070>.
- 626 [6] Hasin Y, Seldin M, Lusic A. Multi-omics approaches to  
627 disease. *Genome Biology* 2017;18:83.  
628 <https://doi.org/10.1186/s13059-017-1215-1>.
- 629 [7] Enche Ady CNA, Lim SM, Teh LK, Salleh MZ, Chin A-V,  
630 Tan MP, et al. Metabolomic-guided discovery of Alzheimer’s  
631 disease biomarkers from body fluid: Metabolomic-based  
632 Alzheimer’s Disease Biomarkers. *J Neuro Res*  
633 2017;95:2005–24. <https://doi.org/10.1002/jnr.24048>.
- 634 [8] Wilkins JM, Trushina E. Application of Metabolomics in  
635 Alzheimer’s Disease. *Front Neurol* 2018;8.  
636 <https://doi.org/10.3389/fneur.2017.00719>.
- 637 [9] Toledo JB, Arnold M, Kastenmüller G, Chang R, Baillie RA,  
638 Han X, et al. Metabolic network failures in Alzheimer’s  
639 disease: A biochemical road map. *Alzheimer’s & Dementia*  
640 2017;13:965–84. <https://doi.org/10.1016/j.jalz.2017.01.020>.
- 641 [10] Fiandaca MS, Mapstone ME, Cheema AK, Federoff HJ. The  
642 critical need for defining preclinical biomarkers in  
643 Alzheimer’s disease. *Alzheimer’s & Dementia*  
644 2014;10:S196–212.  
645 <https://doi.org/10.1016/j.jalz.2014.04.015>.
- 646 [11] Sato C, Barthélemy NR, Mawuenyega KG, Patterson BW,  
647 Gordon BA, Jockel-Balsarotti J, et al. Tau Kinetics in

- 648           Neurons and the Human Central Nervous System. *Neuron*  
649           2018;98:861–4. <https://doi.org/10.1016/j.neuron.2018.04.035>.
- 650 [12] Darst BF, Lu Q, Johnson SC, Engelman CD. Integrated  
651           analysis of genomics, longitudinal metabolomics, and  
652           Alzheimer’s risk factors among 1,111 cohort participants.  
653           *Genetic Epidemiology* 2019;43:657–74.  
654           <https://doi.org/10.1002/gepi.22211>.
- 655 [13] Darst BF, Kosciak RL, Racine AM, Oh JM, Krause RA,  
656           Carlsson CM, et al. Pathway-Specific Polygenic Risk Scores  
657           as Predictors of Amyloid- $\beta$  Deposition and Cognitive  
658           Function in a Sample at Increased Risk for Alzheimer’s  
659           Disease. *Journal of Alzheimer’s Disease* 2016;55:473–84.  
660           <https://doi.org/10.3233/JAD-160195>.
- 661 [14] Racine AM, Kosciak RL, Berman SE, Nicholas CR, Clark LR,  
662           Okonkwo OC, et al. Biomarker clusters are differentially  
663           associated with longitudinal cognitive decline in late midlife.  
664           *Brain* 2016;139:2261–74.  
665           <https://doi.org/10.1093/brain/aww142>.
- 666 [15] Vogt NM, Romano KA, Darst BF, Engelman CD, Johnson  
667           SC, Carlsson CM, et al. The gut microbiota-derived  
668           metabolite trimethylamine N-oxide is elevated in Alzheimer’s  
669           disease. *Alzheimer’s Research & Therapy* 2018;10:124.  
670           <https://doi.org/10.1186/s13195-018-0451-2>.
- 671 [16] Johnson SC, Kosciak RL, Jonaitis EM, Clark LR, Mueller KD,  
672           Berman SE, et al. The Wisconsin Registry for Alzheimer’s  
673           Prevention: A review of findings and current directions.  
674           *Alzheimer’s & Dementia: Diagnosis, Assessment & Disease*  
675           *Monitoring* 2018;10:130–42.  
676           <https://doi.org/10.1016/j.dadm.2017.11.007>.
- 677 [17] Ma Y, Hulle CAV, Norton DL, Lazar KK, Chappell RJ,  
678           Clark LR, et al. P1-286: TRANSFORMATION OF CSF  
679           BIOMARKER VALUES BETWEEN MEASUREMENT  
680           BATCHES. *Alzheimer’s & Dementia* 2018;14:P393–5.  
681           <https://doi.org/10.1016/j.jalz.2018.06.292>.
- 682 [18] Bridgewater BR EA. High Resolution Mass Spectrometry  
683           Improves Data Quantity and Quality as Compared to Unit  
684           Mass Resolution Mass Spectrometry in High-Throughput  
685           Profiling Metabolomics. *Metabolomics* 2014;04.  
686           <https://doi.org/10.4172/2153-0769.1000132>.
- 687 [19] Tibshirani R. Regression Shrinkage and Selection Via the  
688           Lasso. *Journal of the Royal Statistical Society: Series B*  
689           (Methodological) 1996;58:267–88.  
690           <https://doi.org/10.1111/j.2517-6161.1996.tb02080.x>.
- 691 [20] Archer N, Brown RG, Reeves SJ, Boothby H, Nicholas H,  
692           Foy C, et al. Premorbid Personality and Behavioral and  
693           Psychological Symptoms in Probable Alzheimer Disease. *The*

- 694 American Journal of Geriatric Psychiatry 2007;15:202–13.  
695 <https://doi.org/10.1097/01.JGP.0000232510.77213.10>.
- 696 [21] Chong J, Soufan O, Li C, Caraus I, Li S, Bourque G, et al.  
697 MetaboAnalyst 4.0: towards more transparent and integrative  
698 metabolomics analysis. *Nucleic Acids Res* 2018;46:W486–  
699 94. <https://doi.org/10.1093/nar/gky310>.
- 700 [22] Orešič M, Hyötyläinen T, Herukka S-K, Sysi-Aho M, Mattila  
701 I, Seppänen-Laakso T, et al. Metabolome in progression to  
702 Alzheimer’s disease. *Translational Psychiatry* 2011;1:e57–  
703 e57. <https://doi.org/10.1038/tp.2011.55>.
- 704 [23] Koal T, Klavins K, Seppi D, Kemmler G, Humpel C.  
705 Sphingomyelin SM(d18:1/18:0) is Significantly Enhanced in  
706 Cerebrospinal Fluid Samples Dichotomized by Pathological  
707 Amyloid-β42, Tau, and Phospho-Tau-181 Levels. *JAD*  
708 2015;44:1193–201. <https://doi.org/10.3233/JAD-142319>.
- 709 [24] Sindelar M, Dyke JP, Deeb RS, Sondhi D, Kaminsky SM,  
710 Kosofsky BE, et al. Untargeted Metabolite Profiling of  
711 Cerebrospinal Fluid Uncovers Biomarkers for Severity of  
712 Late Infantile Neuronal Ceroid Lipofuscinosis ( CLN2 ,  
713 Batten Disease). *Sci Rep* 2018;8:1–12.  
714 <https://doi.org/10.1038/s41598-018-33449-0>.
- 715 [25] Solé-Domènech S, Rojas AV, Maisuradze GG, Scheraga HA,  
716 Lobel P, Maxfield FR. Lysosomal enzyme tripeptidyl  
717 peptidase 1 destabilizes fibrillar Aβ by multiple  
718 endoproteolytic cleavages within the β-sheet domain. *PNAS*  
719 2018;115:1493–8. <https://doi.org/10.1073/pnas.1719808115>.
- 720 [26] Cruz D, El-Banna M, Majumdar A, Sleat DE, Muldowney M,  
721 Lobel P, et al. Lysosomal enzyme tripeptidyl peptidase 1  
722 plays a role in degradation of beta amyloid fibrils. *BioRxiv*  
723 2019:639682. <https://doi.org/10.1101/639682>.
- 724 [27] Nagata Y, Hirayama A, Ikeda S, Shirahata A, Shoji F,  
725 Maruyama M, et al. Comparative analysis of cerebrospinal  
726 fluid metabolites in Alzheimer’s disease and idiopathic  
727 normal pressure hydrocephalus in a Japanese cohort. *Biomark*  
728 *Res* 2018;6:1–11. <https://doi.org/10.1186/s40364-018-0119-x>.
- 729 [28] Menni C, Kastenmüller G, Petersen AK, Bell JT, Psatha M,  
730 Tsai P-C, et al. Metabolomic markers reveal novel pathways  
731 of ageing and early development in human populations. *Int J*  
732 *Epidemiol* 2013;42:1111–9.  
733 <https://doi.org/10.1093/ije/dyt094>.
- 734 [29] Mapstone M, Cheema AK, Fiandaca MS, Zhong X, Mhyre  
735 TR, MacArthur LH, et al. Plasma phospholipids identify  
736 antecedent memory impairment in older adults. *Nature*  
737 *Medicine* 2014;20:415–8. <https://doi.org/10.1038/nm.3466>.
- 738 [30] Klavins K, Koal T, Dallmann G, Marksteiner J, Kemmler G,  
739 Humpel C. The ratio of phosphatidylcholines to

- 740 lysophosphatidylcholines in plasma differentiates healthy  
741 controls from patients with Alzheimer's disease and mild  
742 cognitive impairment. *Alzheimer's & Dementia: Diagnosis,  
743 Assessment & Disease Monitoring* 2015;1:295–302.  
744 <https://doi.org/10.1016/j.dadm.2015.05.003>.
- 745 [31] Casanova R, Varma S, Simpson B, Kim M, An Y, Saldana S,  
746 et al. Blood metabolite markers of preclinical Alzheimer's  
747 disease in two longitudinally followed cohorts of older  
748 individuals. *Alzheimer's & Dementia* 2016;12:815–22.  
749 <https://doi.org/10.1016/j.jalz.2015.12.008>.
- 750 [32] Li D, Misialek JR, Boerwinkle E, Gottesman RF, Sharrett  
751 AR, Mosley TH, et al. Plasma phospholipids and prevalence  
752 of mild cognitive impairment and/or dementia in the ARIC  
753 Neurocognitive Study (ARIC-NCS). *Alzheimer's &  
754 Dementia: Diagnosis, Assessment & Disease Monitoring*  
755 2016;3:73–82. <https://doi.org/10.1016/j.dadm.2016.02.008>.
- 756 [33] Varma VR, Oommen AM, Varma S, Casanova R, An Y,  
757 Andrews RM, et al. Brain and blood metabolite signatures of  
758 pathology and progression in Alzheimer disease: A targeted  
759 metabolomics study. *PLOS Medicine* 2018;15:e1002482.  
760 <https://doi.org/10.1371/journal.pmed.1002482>.
- 761 [34] Xu Q, Zhang Y, Zhang X, Liu L, Zhou B, Mo R, et al.  
762 Medium-chain triglycerides improved cognition and lipid  
763 metabolomics in mild to moderate Alzheimer's disease  
764 patients with APOE4-/-: A double-blind, randomized,  
765 placebo-controlled crossover trial. *Clin Nutr* 2019.  
766 <https://doi.org/10.1016/j.clnu.2019.10.017>.
- 767 [35] Pardridge WM. The blood-brain barrier: Bottleneck in brain  
768 drug development. *Neurotherapeutics* 2005;2:3–14.  
769 <https://doi.org/10.1602/neurorx.2.1.3>.
- 770 [36] Björkhem Ingemar, Meaney Steve. Brain Cholesterol: Long  
771 Secret Life Behind a Barrier. *Arteriosclerosis, Thrombosis,  
772 and Vascular Biology* 2004;24:806–15.  
773 <https://doi.org/10.1161/01.ATV.0000120374.59826.1b>.
- 774 [37] Zhang J, Liu Q. Cholesterol metabolism and homeostasis in  
775 the brain. *Protein Cell* 2015;6:254–64.  
776 <https://doi.org/10.1007/s13238-014-0131-3>.
- 777 [38] Liu G, Yao L, Liu J, Jiang Y, Ma G, Chen Z, et al.  
778 Cardiovascular disease contributes to Alzheimer's disease:  
779 evidence from large-scale genome-wide association studies.  
780 *Neurobiology of Aging* 2014;35:786–92.  
781 <https://doi.org/10.1016/j.neurobiolaging.2013.10.084>.
- 782 [39] Shang H, Liu G, Jiang Y, Fu J, Zhang B, Song R, et al.  
783 Pathway Analysis of Two Amyotrophic Lateral Sclerosis  
784 GWAS Highlights Shared Genetic Signals with Alzheimer's



- 785 Disease and Parkinson's Disease. *Mol Neurobiol*  
786 2015;51:361–9. <https://doi.org/10.1007/s12035-014-8673-1>.
- 787 [40] Chen J, Xie C, Zhao Y, Li Z, Xu P, Yao L. Gene expression  
788 analysis reveals the dysregulation of immune and metabolic  
789 pathways in Alzheimer's disease. *Oncotarget* 2016;7.  
790 <https://doi.org/10.18632/oncotarget.12505>.
- 791 [41] Lin S, Liu H, Kanawati B, Liu L, Dong J, Li M, et al.  
792 Hippocampal metabolomics using ultrahigh-resolution mass  
793 spectrometry reveals neuroinflammation from Alzheimer's  
794 disease in CRND8 mice. *Anal Bioanal Chem* 2013;405:5105–  
795 17. <https://doi.org/10.1007/s00216-013-6825-1>.
- 796 [42] Yu J, Kong L, Zhang A, Han Y, Liu Z, Sun H, et al. High-  
797 Throughput Metabolomics for Discovering Potential  
798 Metabolite Biomarkers and Metabolic Mechanism from the  
799 APPsw/PS1dE9 Transgenic Model of Alzheimer's Disease.  
800 *J Proteome Res* 2017;16:3219–28.  
801 <https://doi.org/10.1021/acs.jproteome.7b00206>.
- 802 [43] Schubert D. Glucose metabolism and Alzheimer's disease.  
803 *Ageing Research Reviews* 2005;4:240–57.  
804 <https://doi.org/10.1016/j.arr.2005.02.003>.
- 805 [44] Kandimalla R, Thirumala V, Reddy PH. Is Alzheimer's  
806 disease a Type 3 Diabetes? A critical appraisal. *Biochimica et*  
807 *Biophysica Acta (BBA) - Molecular Basis of Disease*  
808 2017;1863:1078–89.  
809 <https://doi.org/10.1016/j.bbadis.2016.08.018>.
- 810 [45] An Y, Varma VR, Varma S, Casanova R, Dammer E,  
811 Pletnikova O, et al. Evidence for brain glucose dysregulation  
812 in Alzheimer's disease. *Alzheimer's & Dementia*  
813 2018;14:318–29. <https://doi.org/10.1016/j.jalz.2017.09.011>.
- 814 [46] Nho K, Kueider-Paisley A, Ahmad S, MahmoudianDehkordi  
815 S, Arnold M, Risacher SL, et al. Association of Altered Liver  
816 Enzymes With Alzheimer Disease Diagnosis, Cognition,  
817 Neuroimaging Measures, and Cerebrospinal Fluid  
818 Biomarkers. *JAMA Netw Open* 2019;2:e197978.  
819 <https://doi.org/10.1001/jamanetworkopen.2019.7978>.
- 820 [47] Dietschy JM, Turley SD. Cholesterol metabolism in the brain.  
821 *Current Opinion in Lipidology* 2001;12:105.
- 822 [48] Frisardi V, Panza F, Seripa D, Farooqui T, Farooqui AA.  
823 Glycerophospholipids and glycerophospholipid-derived lipid  
824 mediators: A complex meshwork in Alzheimer's disease  
825 pathology. *Progress in Lipid Research* 2011;50:313–30.  
826 <https://doi.org/10.1016/j.plipres.2011.06.001>.
- 827 [49] Nitsch R, Pittas A, Blusztajn JK, Slack BE, Growdon JH,  
828 Wurtman RJ. Alterations of phospholipid metabolites in  
829 postmortem brain from patients with Alzheimer's disease.

- 830 Ann N Y Acad Sci 1991;640:110–3.  
831 <https://doi.org/10.1111/j.1749-6632.1991.tb00200.x>.
- 832 [50] Mulder C, Wahlund L-O, Teerlink T, Blomberg M, Veerhuis  
833 R, van Kamp GJ, et al. Decreased  
834 lysophosphatidylcholine/phosphatidylcholine ratio in  
835 cerebrospinal fluid in Alzheimer’s disease. *J Neural Transm*  
836 2003;110:949–55. [https://doi.org/10.1007/s00702-003-0007-](https://doi.org/10.1007/s00702-003-0007-9)  
837 9.
- 838 [51] Ross BM, Moszczynska A, Erlich J, Kish SJ. Phospholipid-  
839 Metabolizing Enzymes in Alzheimer’s Disease: Increased  
840 Lysophospholipid Acyltransferase Activity and Decreased  
841 Phospholipase A2 Activity. *Journal of Neurochemistry*  
842 1998;70:786–93. [https://doi.org/10.1046/j.1471-](https://doi.org/10.1046/j.1471-4159.1998.70020786.x)  
843 4159.1998.70020786.x.
- 844 [52] Zannis VI, Koukos G, Drosatos K, Vezeridis A, Zanni EE,  
845 Kypreos KE, et al. Discrete roles of apoA-I and apoE in the  
846 biogenesis of HDL species: Lessons learned from gene  
847 transfer studies in different mouse models. *Annals of*  
848 *Medicine* 2008;40:14–28.  
849 <https://doi.org/10.1080/07853890701687219>.  
850



851 **Table 1. Wisconsin ADRC and WRAP participant characteristics.**

| Participant Characteristics             | CSF              |                  |                 |                     |                                 |           | Plasma            |
|-----------------------------------------|------------------|------------------|-----------------|---------------------|---------------------------------|-----------|-------------------|
|                                         | Wisconsin ADRC   |                  |                 |                     | WRAP<br>(n = 130 <sup>†</sup> ) | P values* | WRAP<br>(n = 123) |
|                                         | AD<br>(n = 38)   | MCI<br>(n = 29)  | HOC<br>(n = 40) | IMPACT<br>(n = 158) |                                 |           |                   |
| <b>Female:</b> n (%)                    | 12 (31.6)        | 8 (27.6)         | 22 (55.0)       | 118 (74.7)          | 85 (65.4)                       | 0.11      | 80 (65.0)         |
| <b>Age in years:</b><br>mean (SD)       | 71.4 (8.9)       | 74.2 (8.3)       | 74.1 (4.8)      | 57.8 (5.3)          | 61.5 (6.6)                      | <0.001    | 62.6 (6.5)        |
| <b>Education in years:</b><br>mean (SD) | 14.8 (2.9)       | 16.3 (2.8)       | 16.4 (2.9)      | 16.0 (2.3)          | 16.1 (2.2)                      | 0.50      | 16.1 (2.2)        |
| <b>CSF t-tau:</b><br>mean (SD)          | 775.5<br>(332.9) | 573.0<br>(346.9) | 436.8(194.5)    | 283.1<br>(144.2)    | 311.5<br>(117.7)                | 0.03      | 318.9<br>(122.7)  |
| <b>CSF p-tau:</b><br>mean (SD)          | 74.8<br>(27.3)   | 62.4(36.2)       | 52.9 (19.4)     | 39.8<br>(14.5)      | 41.5<br>(13.4)                  | 0.10      | 42.6<br>(13.5)    |

852 \* The p values are based on a two-sample t test conducted between the Wisconsin ADRC IMPACT cohort  
 853 and WRAP (shaded columns). <sup>†</sup>The 130 individuals had 210 longitudinal samples.  
 854  
 855  
 856  
 857  
 858  
 859  
 860  
 861  
 862  
 863  
 864  
 865  
 866

867 **Table 2. Prediction performance ( $r^2$ ) of each model in IMPACT and WRAP.**

|                                                             | IMPACT |       | WRAP  |       |
|-------------------------------------------------------------|--------|-------|-------|-------|
|                                                             | T-tau  | P-tau | T-tau | P-tau |
| <b>Null models: demographics* only</b>                      | 0.083  | 0.106 | 0.085 | 0.087 |
| <b>Enhanced models: demographics and 38 CSF metabolites</b> |        |       |       |       |
| Overall                                                     | 0.703  | 0.757 | 0.624 | 0.651 |
| Female                                                      | 0.787  | 0.791 | 0.591 | 0.640 |
| Male                                                        | NA†    | NA†   | 0.794 | 0.804 |
| <b>Demographics and 7 LASSO selected CSF metabolites</b>    | 0.594  | 0.692 | 0.585 | 0.615 |
| <b>Demographics and 34 Plasma metabolites</b>               | NA†    | NA†   | 0.269 | 0.301 |

868 \* Demographics are age, sex, and years of education.

869 † The sample size for males was too small to perform the analysis in IMPACT.

870  
871  
872  
873  
874  
875  
876  
877  
878  
879  
880  
881  
882  
883  
884  
885  
886

887 **Table 3. LASSO results for CSF t-tau and p-tau in IMPACT and WRAP.**

| IMPACT                                         |             | WRAP                                           |             |
|------------------------------------------------|-------------|------------------------------------------------|-------------|
| <b>T-tau</b>                                   |             |                                                |             |
| Biochemical Name                               | Coefficient | Biochemical Name                               | Coefficient |
| <b>X - 24228</b>                               | 202.10      | <b>N-acetylneuraminate</b>                     | 333.57      |
| <b>N-acetylneuraminate</b>                     | 188.68      | <b>C-glycosyl tryptophan</b>                   | 264.20      |
| Beta-citrylglutamate                           | 151.01      | X - 12906                                      | 97.42       |
| <b>C-glycosyl tryptophan</b>                   | 92.25       | 1-oleoyl-GPC (18:1)                            | 69.00       |
| N-acetylthreonine                              | 78.41       | <b>X - 10457</b>                               | 62.67       |
| <b>1-palmitoyl-GPC (16:0)</b>                  | 72.78       | N6-succinyladenosine                           | 50.65       |
| <b>X - 10457</b>                               | 42.70       | <b>X - 24228</b>                               | 36.65       |
| X - 24699                                      | 33.25       | X - 23739                                      | 28.95       |
|                                                |             | <b>1-palmitoyl-GPC (16:0)</b>                  | 1.38        |
|                                                |             | 1-palmitoyl-2-palmitoleoyl-GPC (16:0/16:1)     | 0.21        |
|                                                |             | X - 18887                                      | -3.56       |
|                                                |             | Ribonate                                       | -112.48     |
| <b>P-tau</b>                                   |             |                                                |             |
| <b>C-glycosyl tryptophan</b>                   | 28.80       | <b>N-acetylneuraminate</b>                     | 30.80       |
| <b>N-acetylneuraminate</b>                     | 24.98       | <b>C-glycosyl tryptophan</b>                   | 30.55       |
| Beta-citrylglutamate                           | 15.71       | <b>X - 10457</b>                               | 9.80        |
| <b>X - 24228</b>                               | 7.37        | N6-succinyladenosine                           | 7.41        |
| <b>X - 10457</b>                               | 5.47        | <b>X - 24228</b>                               | 5.59        |
| 1-palmitoyl-GPC (16:0)                         | 4.26        | X - 12906                                      | 3.66        |
| Cholesterol                                    | 2.52        | Sphingomyelin (d18:1/14:0, d16:1/16:0)         | 3.05        |
| <b>1-oleoyl-GPC (18:1)</b>                     | 2.44        | X - 24699                                      | 3.04        |
| X - 24329                                      | 1.25        | <b>1-oleoyl-GPC (18:1)</b>                     | 2.33        |
| Gulonate                                       | 1.13        | <b>1-myristoyl-2-palmitoyl-GPC (14:0/16:0)</b> | 0.88        |
| <b>1-myristoyl-2-palmitoyl-GPC (14:0/16:0)</b> | 1.07        | X - 18887                                      | -2.50       |
|                                                |             | Ribonate                                       | -4.06       |

888 Metabolites shaded in light grey with bold font are consistent across IMPACT and WRAP.

889  
890  
891  
892  
893  
894  
895  
896  
897  
898  
899  
900

901 **Table 4. Pathway analysis results for the 38 CSF metabolites.**

| KEGG Pathway                             | Pathway Enrichment                  |                                           |       |         |      | Pathway Impact |
|------------------------------------------|-------------------------------------|-------------------------------------------|-------|---------|------|----------------|
|                                          | Total # Metabolites in KEGG Pathway | # Metabolites Identified in Present Study | Raw p | -Log(p) | FDR  | Impact         |
| Pentose and glucuronate interconversions | 18                                  | 3                                         | 2E-04 | 8.80    | 0.01 | 0.25           |
| Glycerophospholipid metabolism           | 36                                  | 2                                         | 0.02  | 3.86    | 0.88 | 0.11           |
| Linoleic acid metabolism                 | 5                                   | 1                                         | 0.03  | 3.45    | 0.89 | 0              |
| Ascorbate and aldarate metabolism        | 8                                   | 1                                         | 0.05  | 2.98    | 1    | 0              |
| alpha-Linolenic acid metabolism          | 13                                  | 1                                         | 0.08  | 2.51    | 1    | 0              |
| Sphingolipid metabolism                  | 21                                  | 1                                         | 0.13  | 2.06    | 1    | 0              |
| Arachidonic acid metabolism              | 36                                  | 1                                         | 0.21  | 1.56    | 1    | 0              |
| Steroid biosynthesis                     | 42                                  | 1                                         | 0.24  | 1.42    | 1    | 0.03           |
| Primary bile acid biosynthesis           | 46                                  | 1                                         | 0.26  | 1.34    | 1    | 0.05           |
| Steroid hormone biosynthesis             | 85                                  | 1                                         | 0.43  | 0.84    | 1    | 0.005          |

902 Raw p is the original p value calculated from the enrichment analysis; FDR p is the p value adjusted  
 903 using False Discovery Rate; Impact is the pathway impact value calculated from the pathway topology  
 904 analysis. The shaded two pathways are considered important.

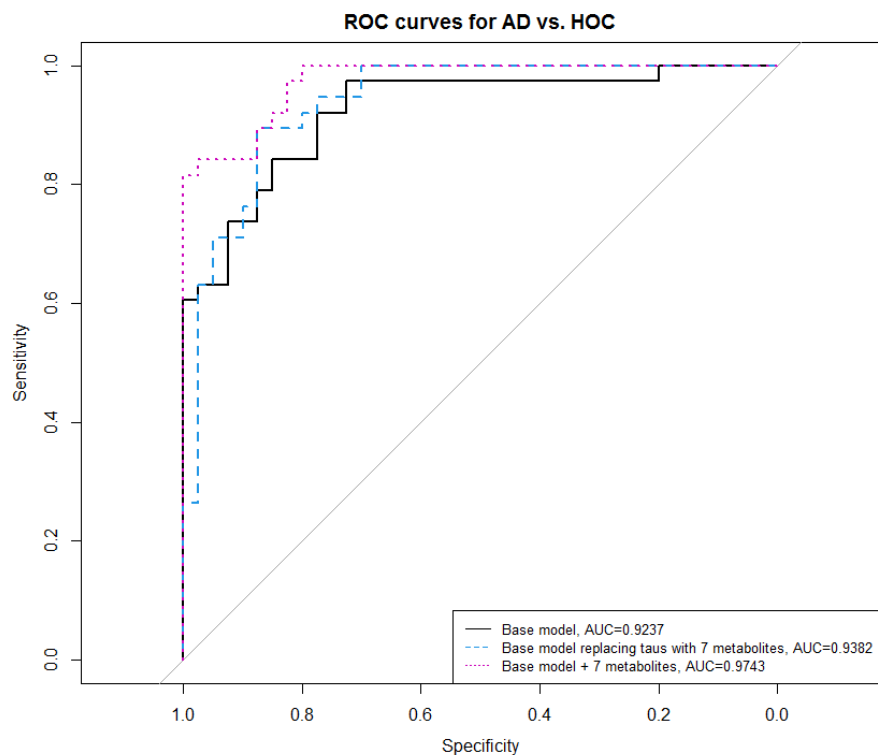

(a)

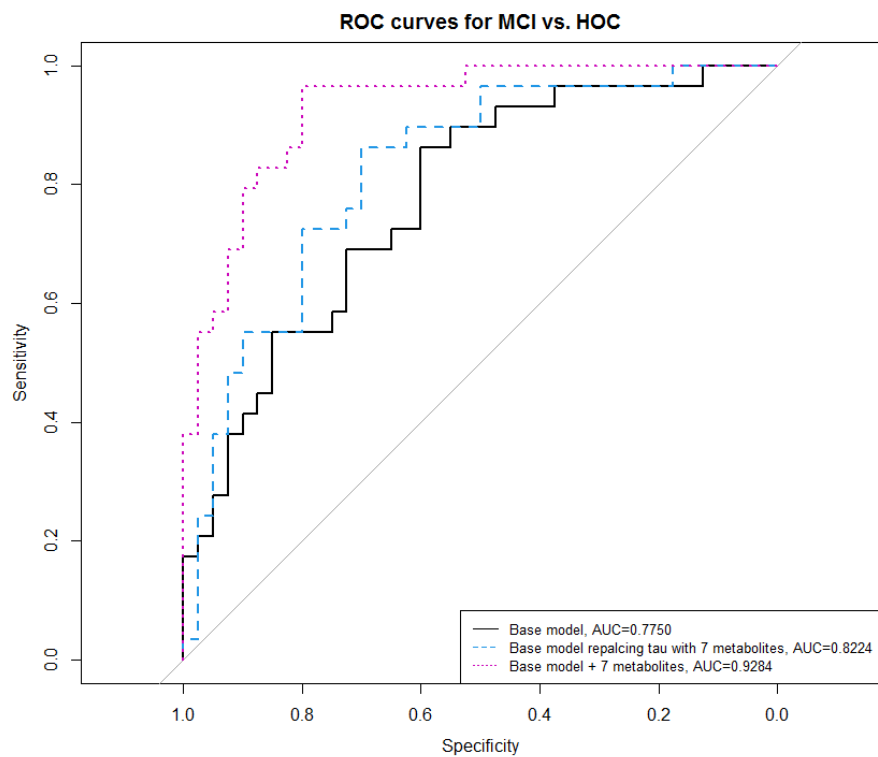

(b)

**Figure 1. ROC curves and AUC scores of predictions by 6 models in the Wisconsin ADRC (a) AD vs. HOC (b) MCI vs. HOC.** Base model: age, sex, years of education, *APOE*  $\epsilon 4$  count, t-tau, p-tau, and  $A\beta 42$ ; base model replacing t-tau and p-tau with the seven selected metabolites from LASSO; and base model plus the seven selected metabolites from LASSO.

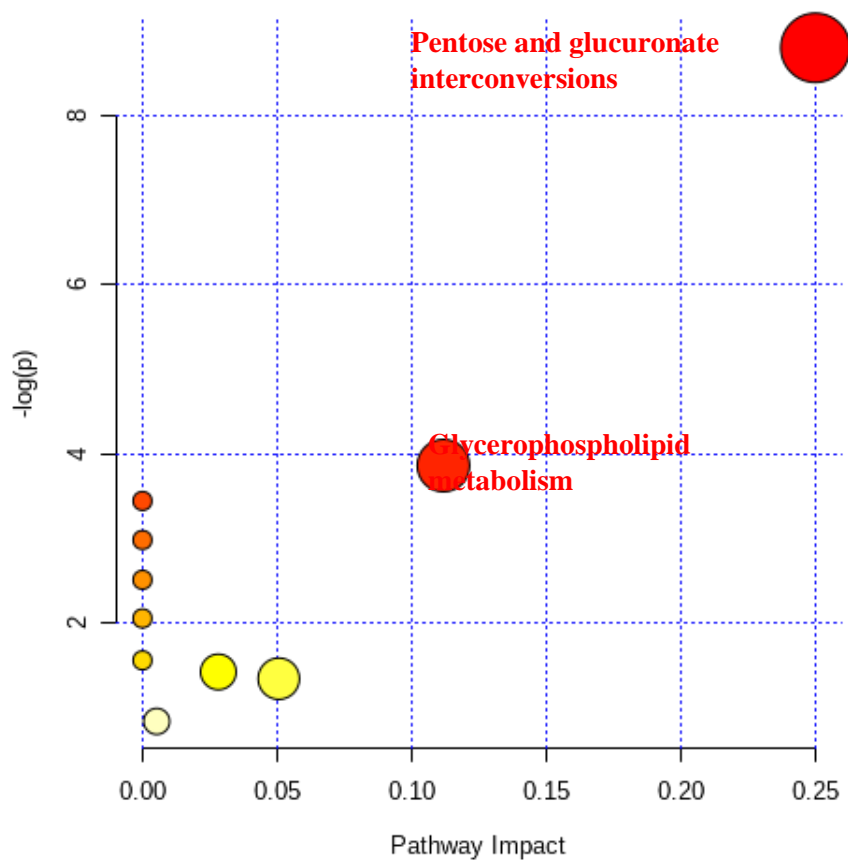

913  
914  
915  
916  
917

**Figure 2. Pathway analysis results for 23 CSF metabolites.** The x-axis represents the pathway impact, and y-axis represents the pathway enrichment. Larger sizes and darker colors represent higher pathway impact and enrichment, respectively.
